# Supplementary material for: Glycine Supplementation in Obesity Worsens Glucose Intolerance through Enhanced Liver Gluconeogenesis
Source: MDPI journal article supplement (doi:10.3390/nu15010096), 2022-12-24
Supplement: s1 [file s1]

**Table S1 – Metabolite concentrations measured by NMR in the liver of SD, HFHS and HFHS-GLY-fed mice.**

| Metabolite concentration<br>(nmol/ 100 mg tissue) | SD         | HFHS        | HFHS-GLY    | ANOVA p-value |
|---------------------------------------------------|------------|-------------|-------------|---------------|
| Glycine                                           | 119.9±4.0  | 91.6±6.2**  | 110.6±6.7   | P<0.01        |
| sn-Glycero-3-phosphocholine                       | 53.8±5.7   | 35.4±3.7    | 40.8±6.4    | NS            |
| Methionine                                        | 8.9±0.6    | 8.1±0.4     | 9.1±0.7     | NS            |
| Choline                                           | 7.3±0.9    | 14.9±2.0**  | 16.9±1.5*** | P<0.01        |
| O-Phosphocholine                                  | 9.8±0.7    | 27.5±4.0*** | 28.4±3.1*** | P<0.0001      |
| Sarcosine                                         | 0.8±0.1    | 1.1±0.1     | 1.5±0.3     | NS            |
| N,N-Dimethylglycine                               | 2.1±0.2    | 2.1±0.3     | 2.4±0.4     | NS            |
| Betaine                                           | 22.0±3.1   | 25.2±3.3    | 23.9±2.5    | NS            |
| Pyruvate                                          | 1.7±0.2    | 1.5±0.2     | 2.2±0.3     | NS            |
| Succinate                                         | 47.2±4.0   | 42.9±2.9    | 52.7±5.3    | NS            |
| Malate                                            | 22.6±2.5   | 22.8±2.3    | 27.8±2.5    | NS            |
| 3-Hydroxyisovalerate                              | 2.7±0.2    | 2.4±0.3     | 2.9±0.3     | NS            |
| Leucine                                           | 12.1±0.7   | 13.3±1.3    | 14.0±0.7    | NS            |
| Isoleucine                                        | 6.9±0.4    | 7.1±0.8     | 7.5±0.4     | NS            |
| Valine                                            | 11.4±0.8   | 13.2±1.3    | 13.5±0.7    | NS            |
| Glutamate                                         | 54.5±5.4   | 69.2±7.5    | 70.2±3.0    | NS            |
| Alanine                                           | 112.4±9.5  | 95.1±6.3    | 97.1±8.6    | NS            |
| Lactate                                           | 597.3±58.8 | 453.7±16.4  | 504.1±51.9  | NS            |
| Glycerol                                          | 41.8±2.9   | 30.1±2.8*   | 34.2±2.3    | P<0.05        |
| Glucose                                           | 1677±65    | 1642±115    | 1813±102    | NS            |
| N-Acetylcysteine                                  | 2.3±0.1    | 1.7±0.2*    | 2.1±0.2     | P<0.05        |
| Glutathione                                       | 4.6±0.2    | 5.0±0.1     | 4.4±0.6     | NS            |

Comparison vs. SD: \*p<0.05; \*\*p<0.01; \*\*\*p<0.001

**Table S2 – Metabolite concentrations measured by NMR in the *gastrocnemius* muscle of SD, HFHS and HFHS-GLY-fed mice.**

| Metabolite<br>concentration (nmol/<br>100 mg tissue) | SD         | HFHS        | HFHS-GLY            | ANOVA p-<br>value |
|------------------------------------------------------|------------|-------------|---------------------|-------------------|
| Glycine                                              | 139.6±4.3  | 131.1±7.7   | 187.9±5.9***,\$\$\$ | P<0.0001          |
| Choline                                              | 14.7±1.0   | 13.6±0.3    | 15.5±0.6            | NS                |
| Sarcosine                                            | 0.40±0.02  | 0.30±0.02*  | 0.35±0.02           | P<0.05            |
| Pyruvate                                             | 6.5±0.4    | 5.6±0.4     | 5.9±0.2             | NS                |
| Succinate                                            | 25.7±1.9   | 25.4±3.0    | 25.6±2.3            | NS                |
| 3-Hydroxyisovalerate                                 | 2.4±0.1    | 2.5±0.1     | 2.5±0.1             | NS                |
| Leucine                                              | 6.4±0.3    | 6.8±0.5     | 7.7±0.2*            | P<0.05            |
| Isoleucine                                           | 5.0±0.3    | 4.5±0.3     | 5.2±0.1             | NS                |
| Valine                                               | 10.7±0.5   | 10.0±0.4    | 11.2±0.3            | NS                |
| Glutamate                                            | 81.4±4.3   | 60.5±4.4**  | 68.7±1.5            | P<0.01            |
| Alanine                                              | 118.2±6.8  | 140.9±4.0** | 108.1±2.7\$\$\$     | P<0.001           |
| Lactate                                              | 893.6±79.2 | 1060.7±83.4 | 740.3±18.6\$\$      | P<0.01            |
| Glycerol                                             | 31.9±4.2   | 38.4±2.7    | 44.2±3.6            | NS                |
| Glucose                                              | 41.1±4.1   | 58.6±10.0   | 58.4±5.5            | NS                |
| Glutathione                                          | 15.4±1.0   | 18.6±1.4    | 15.1±0.8            | NS                |

Comparison vs. SD: \*p<0.05; \*\*p<0.01; \*\*\*p<0.001. Comparison vs. HFHS: \$\$p<0.01;

\$\$\$p<0.001
